# Supplementary material
Source: PubMed Central journal article supplement (PMC2767184)
Supplement: NIHMS152790-supplement-supplement_1.pdf [file NIHMS152790-supplement-supplement_1.pdf]

**The genetic and molecular regulation of sleep: from fruit flies to humans  
Supplementary Tables**

Chiara Cirelli

Department of Psychiatry, University of Wisconsin, Madison, WI 53719, USA

Dept. of Psychiatry  
University of Wisconsin-Madison  
6001 Research Park Blvd  
Madison, WI 53719 USA  
ccirelli@wisc.edu  
(608) 263-9236

Acknowledgements. This work was funded by NIH grants P20 MH077967 and R01 GM075315. I thank Drs Daniel Bushey, Stephanie Maret and Giulio Tononi for critical comments on the manuscript, and Drs Daniel Bushey, Emmanuel Mignot and David Raizen for providing the pictures for Box 1.

**Supplementary Table 1. Twin studies with heritability estimates for sleep phenotypes (% of variance explained by genetic effects)**

| Ref                                                                 | Study type                                                | Major Findings                                                                                                                                                                                      |
|---------------------------------------------------------------------|-----------------------------------------------------------|-----------------------------------------------------------------------------------------------------------------------------------------------------------------------------------------------------|
| <b>By questionnaire</b>                                             |                                                           |                                                                                                                                                                                                     |
| Partinen et al.,<br>Sleep 6:179, 1983 <sup>1</sup>                  | Finnish twin pairs (2238MZ, 4545DZ):                      | heritability of both duration of sleep and sleep quality ~ 44%, sleep apnea ≥50%                                                                                                                    |
| Heath et al.,<br>Sleep 13:318, 1990 <sup>2</sup>                    | Australian twin pairs (1800MZ, 2010DZ)                    | heritability of sleep quality 32%, sleep time ~42%, sleep duration 40%, insomnia complains 32-36%, sleepiness 39%                                                                                   |
| McCarren et al.,<br>Sleep 17 :456, 1994 <sup>3</sup>                | Vietnam era veteran twins                                 | heritability of sleep-onset insomnia 28%, sleep-maintenance insomnia 42%                                                                                                                            |
| Carmelli et al.,<br>J Sleep Res 10:53, 2001 <sup>4</sup>            | World War II male veteran twin pairs (818MZ, 742DZ)       | heritability of subjective sleepiness (Epworth Sleepiness scale, ESS) 38% (most likely due to genetic susceptibility to sleep apnea)                                                                |
| Vink et al.<br>Chronobiol Int 18:809, 2001 <sup>5</sup>             | Dutch twin family study                                   | heritability of morningness/eveningness 44-47%                                                                                                                                                      |
| Carmelli et al.,<br>Sleep 27:917, 2004 <sup>6</sup>                 | World War II male veteran twin pairs (68MZ, 54DZ)         | heritability of sleep disordered breathing ~36%                                                                                                                                                     |
| Watson et al.,<br>Sleep 29:645, 2006 <sup>7</sup>                   | Washington State twin pairs (1042MZ, 828DZ; 32-year old): | heritability of insomnia 57%, sleepiness 38%, obesity 73%; additive genetic effects found for insomnia/obesity and insomnia/sleepiness                                                              |
| Luciano et al.,<br>Sleep 30: 1378, 2007 <sup>8</sup>                | Australian twin pairs (1799MZ, 2009DZ):                   | heritability of coffee-attributed sleep disturbance ~ 40%; main source of genetic variance unrelated to a general sleep-disturbance factor                                                          |
| Koskenvuo et al.,<br>J Sleep Res 16:156, 2007 <sup>9</sup>          | Finnish twin pairs (2836MZ, 5917DZ):                      | heritability of morningness/eveningness 50% (12% additive, 38% due to dominance)                                                                                                                    |
| <b>By EEG analysis</b>                                              |                                                           |                                                                                                                                                                                                     |
| Linkowski et al.,<br>J Sleep Res 8 (Suppl.1):11, 1999 <sup>10</sup> | Belgian twin pairs (45MZ, 46DZ)                           | heritability of SWS duration 50%                                                                                                                                                                    |
| Ambrosius et al.<br>Biol Psych 64:344-8, 2008 <sup>11</sup>         | German twin pairs (35MZ, 14DZ)                            | Significant genetic influence for SWS duration, REM sleep duration, NREM spectral power within the alpha (8-12Hz) and low sigma (13-14Hz) range, and in the 2-13Hz range (using 1hz frequency bins) |
| De Gennaro et al.,<br>Ann of Neurol 2008, in press <sup>12</sup>    | Italian twin pairs (10MZ, 10DZ)                           | heritability of EEG power spectrum in NREM sleep (8-16Hz) 96%                                                                                                                                       |

**Supplementary Table 2. Studies in flies and mice using reverse and forward genetics to show effects of single candidate genes on sleep. Fly studies are indicated in blue, forward genetic studies in bold.**

| Gene                                                                                      | Major findings                                                                                                                                                                                                                           | Ref            |
|-------------------------------------------------------------------------------------------|------------------------------------------------------------------------------------------------------------------------------------------------------------------------------------------------------------------------------------------|----------------|
| <b>Circadian regulation</b>                                                               |                                                                                                                                                                                                                                          |                |
| <i>Clock</i> mutant mice (partial deletion of the Clock protein)                          | ~ 18% less total sleep/24h (due to less NREM sleep)<br>Same % of total sleep recovered after sleep deprivation; normal increase in delta activity after sleep deprivation; ~50% smaller increase in REM sleep after sleep deprivation    | 13             |
| <i>Dbp</i> (albumin D-binding protein) KO mice                                            | More sleep during the night (trend, ns), ~25% less REM sleep during the light period; no change in total sleep duration and sleep homeostasis                                                                                            | 14             |
| <i>Cry 1, 2</i> (cryptochrome 1 and 2) double KO mice                                     | ~20% increase in NREM sleep/24h (due to more sleep at night); higher NREM delta activity in baseline; smaller increases relative to wild-type mice in sleep duration (5 vs 33%) and delta activity (134 vs 170%) after sleep deprivation | 15             |
| <i>Cry 1</i> KO mice                                                                      | Normal sleep amount and sleep regulation                                                                                                                                                                                                 | 16             |
| <i>Cry 2</i> KO mice                                                                      | Normal sleep amount and sleep regulation                                                                                                                                                                                                 | 16             |
| <i>mPer1, mPer2, mPer3</i> (Period 1,2,3) KO mice                                         | Altered 24h distribution of sleep; no change in total sleep duration or sleep homeostasis                                                                                                                                                | 17<br>18       |
| <i>mPer1/mPer2</i> double KO mice                                                         |                                                                                                                                                                                                                                          |                |
| <i>Bmal1</i> (brain and muscle ARNT-like protein 1) KO mice                               | <15% increase in NREM sleep/24h; sleep fragmentation; slightly smaller homeostatic response after sleep deprivation                                                                                                                      | 19             |
| <i>Npas2</i> (neuronal PAS domain protein 2) KO mice                                      | Less NREM sleep only in the second half of the dark period; smaller increase in NREM duration (males only) and in delta activity after sleep deprivation                                                                                 | 20<br>21       |
| <i>Prok2</i> (prokineticin 2) KO mice                                                     | ~20% less total sleep/24h (due to less NREM sleep in the light phase, but REM sleep is increased); smaller increase in delta activity and REM sleep after sleep deprivation                                                              | 22             |
| <b>Related to neurotransmitters/neuropeptides</b>                                         |                                                                                                                                                                                                                                          |                |
| <i>Adora1</i> (adenosine A1 receptor) KO mice                                             | Normal 24h sleep/waking amounts; normal response to sleep deprivation<br>Normal increase in waking after caffeine                                                                                                                        | 23<br>24       |
| <i>Adora2a</i> (adenosine A2A receptor) KO mice                                           | Daily sleep/waking amounts not reported; no increase in sleep after infusion of adenosine A2A receptor agonist<br>Preliminary evidence of no increase in NREM sleep after sleep deprivation<br>No increase in waking after caffeine      | 25<br>26<br>24 |
| <i>nAChR-α4</i> (nicotinic acetylcholine receptor alpha 4 subunit) knock in mice          | Increased brief awakenings                                                                                                                                                                                                               | 27             |
| <i>nAChR-β2</i> (nicotinic acetylcholine receptor beta 2 subunit) KO mice                 | Normal sleep/waking amounts; longer duration of REM sleep episodes; fewer microarousals in baseline and after sleep deprivation<br>Decreased arousal from sleep after episodic hypoxia                                                   | 28<br>29       |
| <i>Chrm3, Chrm2/4</i> (muscarinic acetylcholine receptor M3, M2/M4) KO mice               | 22% less REM sleep in M3 KO mice                                                                                                                                                                                                         | 30             |
| <i>Dat</i> (dopamine transporter) KO mice                                                 | ~18% more waking/24h, ~ 25% less NREM/24h<br>No increase in waking after modafinil or amphetamines                                                                                                                                       | 31             |
| <i>Maoa</i> (monoamine oxidase A) transgenic Tg8 mice (MAOA-deficient)                    | Normal sleep/waking amounts; increased sleep apneas                                                                                                                                                                                      | 32             |
| <i>Dbh</i> (dopamine beta hydroxylase) KO mice (norepinephrine and epinephrine deficient) | Increased total sleep (due to 30% more NREM); no increase in sleep time after deprivation<br>reduced latency to sleep after mild stressors; increased arousal threshold after sleep deprivation                                          | 33<br>34<br>35 |
| <i>Sert</i> (serotonin transporter) KO mice                                               | ~50% more REM sleep/24h                                                                                                                                                                                                                  | 36<br>37       |
| <i>5-Htr1a</i> (serotonin receptor 1A) KO mice                                            | ~40% more REM sleep/24h; no increase in REM sleep after sleep deprivation                                                                                                                                                                | 38             |
| <i>5-Htr1b</i> (serotonin receptor 1B) KO mice                                            | ~30% more REM sleep, and ~ 10% less NREM sleep in the light phase; no increase in REM sleep after sleep deprivation-                                                                                                                     | 39             |

|                                                                                                                                            |                                                                                                                                                                                                                                                                                  |                               |
|--------------------------------------------------------------------------------------------------------------------------------------------|----------------------------------------------------------------------------------------------------------------------------------------------------------------------------------------------------------------------------------------------------------------------------------|-------------------------------|
| <i>5-Htr2a</i> (serotonin receptor 2A) KO mice                                                                                             | ~25% less NREM sleep/24h; no increase in delta activity after sleep deprivation                                                                                                                                                                                                  | 40                            |
| <i>5-Htr2c</i> (serotonin receptor 2C) KO mice                                                                                             | ~20% more waking/24h, ~ 20% less NREM sleep/24h; increase in NREM sleep duration after sleep deprivation (20-40% vs ns in controls); larger increase in delta activity after sleep deprivation relative to controls                                                              | 41                            |
| <i>5-Htr7</i> (serotonin receptor 7) KO mice                                                                                               | <20% less REM sleep/24h (decrease in the light period only)                                                                                                                                                                                                                      | 42                            |
| <i>Hdc</i> (histidine decarboxylase) KO mice                                                                                               | >23% more REM sleep/24h; decreased waking around the light-to-dark transition; shorter sleep latency compared to wild type mice after behavioral stimuli                                                                                                                         | 43                            |
| <i>Hrh1</i> (histamine H1 receptor) KO mice                                                                                                | Normal sleep/waking amounts (but fewer brief awakenings); no increase in waking after infusion of orexin A in the lateral ventricle<br>No increase in waking after infusion of H3 receptor antagonist                                                                            | 44<br>45<br>46                |
| <i>Hrh2</i> (histamine H2 receptor) KO mice<br><i>Hrh3</i> (histamine H3 receptor) KO mice<br><i>Hdc</i> (histidine-decarboxylase) KO mice | No increase in waking after infusion of H3 receptor antagonists in HDC or H3R KO mice; increased waking in H2R KO mice                                                                                                                                                           | 46                            |
| <i>Hcrt/Ox</i> (Prepro-hypocretin/orexin) KO mice                                                                                          | “narcoleptic episodes” (behavioral arrest); sleep-onset REM episodes; decreased latency to REM sleep; more REM sleep in the dark period<br>slightly more REM sleep in the dark period; fewer waking episodes of long duration; normal circadian and homeostatic sleep regulation | 47<br>48<br>49                |
| <i>Hcrt/Ox -ataxin 3</i> transgenic mice (loss of orexin cells)                                                                            | Effects on sleep very similar to those in the <i>Prepro-orexin</i> KO mice                                                                                                                                                                                                       | 50                            |
| <i>Hcrt/Ox -ataxin 3</i> transgenic rats (loss of orexin cells)                                                                            | Narcoleptic phenotype similar to those in orexin-ataxin 3 mice                                                                                                                                                                                                                   | 51                            |
| <i>Hcrt1</i> (Hypocretin receptor 1) KO mice                                                                                               | Mild sleep fragmentation                                                                                                                                                                                                                                                         | 52                            |
| <i>Hcrt2</i> (Hypocretin receptor 2) KO mice<br><i>Hcrt1,2</i> (Hypocretin receptor 1,2) double KO mice                                    | decrease in duration of waking and NREM sleep bouts (mostly in the dark phase); not as affected by “cataplexy-like” attacks of REM sleep as prepro-orexin KO mice<br>effects on sleep very similar to those in the <i>Prepro-orexin</i> KO mice                                  | 53                            |
| <i>Gabra1</i> (GABA-A receptor $\alpha$ 1 subunit; point mutation H101R)                                                                   | Normal 24h sleep/waking amounts; sleep effects of diazepam as in wild-type mice                                                                                                                                                                                                  | 54                            |
| <i>Gabra2</i> (GABA-A receptor $\alpha$ 2 subunit; point mutation H101R)                                                                   | Smaller decrease in NREM delta activity after diazepam                                                                                                                                                                                                                           | 55                            |
| <i>Gabra3</i> (GABA-A receptor $\alpha$ 3 subunit; point mutation H126R; diazepam-insensitive)                                             | Decrease in NREM delta activity after diazepam as in controls                                                                                                                                                                                                                    | 56                            |
| <i>Gabra3</i> KO mice                                                                                                                      | Normal 24h sleep/waking amounts; normal sleep homeostasis; reduced spindling activity (10-15Hz) at the NREM-REM transition                                                                                                                                                       | 57                            |
| <i>Gabbr3</i> (GABA-A receptor $\beta$ 3 subunit) KO mice                                                                                  | Normal 24h sleep/waking amounts; no increase in sleep after oleamide infusion<br><br>~ 25% less REM sleep during the light phase; ~50% increase in NREM EEG power (mainly <7Hz); blunted increase in spindling (sigma activity) at the transition NREM-REM                       | 58<br>59                      |
| <i>Gabrd</i> (GABA-A receptor $\delta$ subunit) KO mice                                                                                    | No abnormal EEG pattern after gaboxadol                                                                                                                                                                                                                                          | 60                            |
| <i>Gria3</i> (glutamate AMPA receptor Glur3 subunit) KO mice                                                                               | 8h of recording in the light phase only; overall decrease in EEG power in waking and NREM sleep; no increase in low range (<7.5Hz) EEG power in NREM sleep relative to waking or REM sleep                                                                                       | 61                            |
| <i>Grin2a</i> (glutamate NMDA receptor NR2A subunit) KO mice                                                                               | Normal amount of NREM sleep                                                                                                                                                                                                                                                      | 62                            |
| <b>Other signaling pathways, hormones</b>                                                                                                  |                                                                                                                                                                                                                                                                                  |                               |
| <b><i>Sleepless</i> (glycosyl-phosphatidylinositol-anchored protein) loss of function mutation (<i>P'</i>)</b>                             | ~85% decrease in daily sleep amounts, mainly due to decrease in sleep episode duration; no hyperactivity but motor incoordination; weak rest/activity rhythm, reduced response to sleep deprivation; reduced lifespan                                                            | 63<br>Insertional mutagenesis |

|                                                                                                        |                                                                                                                                                                                                                                                                                                                   |                                    |
|--------------------------------------------------------------------------------------------------------|-------------------------------------------------------------------------------------------------------------------------------------------------------------------------------------------------------------------------------------------------------------------------------------------------------------------|------------------------------------|
| <b><i>Acads</i> (short-chain acyl-coenzyme A dehydrogenase)</b>                                        | A deficiency in <i>Acads</i> is linked to a slower theta peak frequency during REM sleep (mouse chromosome 5)                                                                                                                                                                                                     | <sup>64</sup><br>QTL analysis      |
| <b><i>Rarb</i> (retinoid acid receptor beta)</b>                                                       | A deletion and polymorphisms affecting <i>Rarb</i> expression influence cortical EEG synchrony during NREM sleep as measured by the ratio between delta and theta activity (mouse chromosome 14)                                                                                                                  | <sup>65</sup><br>QTL analysis      |
| <i>Pgds</i> (prostaglandin D synthase) transgenic mice                                                 | Normal 24h sleep/waking amounts; increased NREM sleep after tail clipping                                                                                                                                                                                                                                         | <sup>66</sup>                      |
| <i>L-Pgds</i> (lipocalin-type PGDS) KO mice                                                            | Decreased sleep after infusion of PGDS inhibitor in <i>H-PGDS</i> KO mice but not in <i>L-PGDS</i> KO mice or <i>H-PGDS/L-PGDS</i> double KO mice                                                                                                                                                                 | <sup>67</sup>                      |
| <i>H-Pgds</i> (hematopoietic-type PGDS) KO mice                                                        |                                                                                                                                                                                                                                                                                                                   |                                    |
| <i>Dp</i> (prostaglandin receptor) KO mice                                                             | No increase in NREM sleep after prostaglandin D2 infusion<br>No decrease in sleep after infusion of PGDS inhibitor                                                                                                                                                                                                | <sup>68</sup><br><sup>67</sup>     |
| <i>Il1r1</i> (interleukin-1beta type 1 receptor) KO mice                                               | Normal 24h sleep/waking amounts (<20% less NREM in the dark phase)<br>No increase in sleep after IL-1 infusion                                                                                                                                                                                                    | <sup>69</sup>                      |
| <i>Il6</i> (interleukin 6) KO mice                                                                     | ~30% more REM sleep in baseline<br>Smaller increase in NREM sleep after administration of lipopolysaccharide                                                                                                                                                                                                      | <sup>70</sup><br><sup>71</sup>     |
| <i>Il10</i> (interleukin 10) KO mice                                                                   | Normal 24h sleep/waking amounts (<20% more NREM in the dark phase)                                                                                                                                                                                                                                                | <sup>72</sup>                      |
| <i>Tnfr1</i> (TNF receptor 1) KO mice                                                                  | ~20% less NREM sleep/24h (due to decrease in the light phase), and ~ 20% less REM sleep/24h (genetic background?)<br><br>No change in 24h amounts of sleep                                                                                                                                                        | <sup>73</sup><br><br><sup>74</sup> |
| <i>Tnfr2</i> (TNF receptor 2) KO mice                                                                  | No change in 24h amounts of sleep; ~15% less REM sleep in the light phase                                                                                                                                                                                                                                         | <sup>74</sup>                      |
| <i>Tnf-It-alpha</i> (TNF and lymphotoxin alpha) double KO mice                                         | ~15% less REM sleep/24h (due to a decrease in the light phase)                                                                                                                                                                                                                                                    | <sup>74</sup>                      |
| <i>Ifnar1</i> (interferon type 1 receptor) KO mice                                                     | ~30% less REM sleep/24h                                                                                                                                                                                                                                                                                           | <sup>75</sup>                      |
| <i>Nfkb1</i> (nuclear factor-kappaB p50 subunit) KO mice                                               | 26% more sleep/24h (increase in both NREM and REM sleep); larger response after sleep deprivation (increase in NREM sleep and delta activity)                                                                                                                                                                     | <sup>76</sup>                      |
| <i>Nos</i> (Nitric oxide synthase) KO mice                                                             | REM sleep reduced (33% less, light phase) in neuronal NOS KO, and increased (28% more, light phase) in inducible NOS KO mice                                                                                                                                                                                      | <sup>77</sup>                      |
| <i>Prkg1</i> (cGMP-dep. Protein kinase type I) conditional KO mice (lacking <i>Prkg1</i> in the brain) | Normal total sleep/24h (but more awake in the light phase); ~25% decrease in REM sleep; reduced NREM delta activity during baseline, but normal delta rebound after sleep deprivation; increased sleep duration after sleep deprivation; increased fragmentation (shorter episodes) of both waking and NREM sleep | <sup>78</sup>                      |
| <i>ArKO</i> (aromatase cytochrome P450) deficient female mice (estrogen-deficient)                     | Normal total sleep/24h (but more sleep in the dark phase); normal response to sleep deprivation                                                                                                                                                                                                                   | <sup>79</sup>                      |
| <i>Lep</i> (ob/ob, leptin-deficient) mice                                                              | ~10% increase in NREM sleep; sleep fragmentation; smaller increase in sleep time after sleep deprivation                                                                                                                                                                                                          | <sup>80</sup>                      |
| <i>Ghrl</i> (ghrelin) KO mice                                                                          | Slight decrease in NREM sleep, and slight increase in REM sleep; normal response to sleep deprivation                                                                                                                                                                                                             | <sup>81</sup>                      |
| <i>Prl</i> (prolactin) KO mice                                                                         | ~30% less REM sleep (light phase only); smaller increase in REM sleep after sleep deprivation                                                                                                                                                                                                                     | <sup>82</sup>                      |

|                                                                                                               |                                                                                                                                                                                                                         |          |
|---------------------------------------------------------------------------------------------------------------|-------------------------------------------------------------------------------------------------------------------------------------------------------------------------------------------------------------------------|----------|
| Dwarf ( <i>dw/dw</i> ) rats (nonfunctional GHRH receptor)                                                     | ~20% less NREM sleep (both light and dark phase); ~30% less REM sleep (light phase only); smaller increase in delta activity after sleep deprivation                                                                    | 83       |
| Dwarf ( <i>lit/lit</i> ) mice (nonfunctional GHRH receptor)                                                   | ~30% less NREM sleep and <20% less REM sleep in the light phase;                                                                                                                                                        | 84       |
| <i>TH-hGH</i> transgenic mice (somatotrophic axis deficiency)                                                 | ~ 30% less NREM sleep/24h                                                                                                                                                                                               | 85       |
| <i>MT-rGH</i> transgenic mice (growth hormone overexpression)                                                 | 11% more NREM sleep and 40% more REM sleep during the light period only                                                                                                                                                 | 86       |
| <i>Mchr1</i> (melanin-concentrating hormone receptor 1) KO mice                                               | Normal total sleep/24h; 19% more REM sleep in the light phase; larger increase in NREM sleep after total sleep deprivation; no differences relative to controls after REM sleep deprivation                             | 87       |
| <i>Faah</i> (fatty acid amide hydrolase) KO mice (catabolism of endogenous cannabinoids)                      | <15% less waking and <10% more NREM sleep during the light period only; 6% more NREM delta activity during the light period; normal response to sleep deprivation                                                       | 88       |
| <i>Plcb1</i> (phospholipase C, b1 isoform) KO mice                                                            | Irregular theta activity in REM sleep                                                                                                                                                                                   | 89       |
| <i>CRH</i> (corticotrophin-releasing hormone) conditional overexpressing mice (whole brain or forebrain only) | Increased REM sleep (dark period) and decreased NREM sleep (light period) after overexpression in the whole brain (similar trend after overexpression in forebrain only); increased REM rebound after sleep deprivation | 90       |
| <b>Others: transcription factors, synaptic vesicle release, etc</b>                                           |                                                                                                                                                                                                                         |          |
| <i>Prnp</i> (prion) KO mice                                                                                   | Normal 24h sleep/waking amounts; increased sleep fragmentation (~ 2-fold increase in brief awakenings); larger increase in delta activity after sleep deprivation (40% increase vs 20% in controls)                     | 91<br>92 |
| <i>Prnp</i> transgenic mice (carrying the D178N/V129 mutation)                                                | EEG abnormalities (bursts of polyphasic complexes), lack of sleep spindles, reduced REM sleep, presence of a mixed (sleep/wake) state                                                                                   | 93       |
| Beta-amyloid precursor protein overexpressing mice                                                            | ~25% less REM sleep/24h                                                                                                                                                                                                 | 94       |
| <i>Stop</i> (calmodulin-regulated microtubule-associated protein) KO mice                                     | Videotape, 3h in the dark phase only: reduced "sleeping" time; less grooming before sleep                                                                                                                               | 95       |
| <i>Rho-GDI gamma</i> KO mice                                                                                  | Normal sleep/waking cycle and EEG                                                                                                                                                                                       | 96       |
| <i>Ube3a</i> (ubiquitin-protein ligase) KO mice (animal model for Angelman syndrome)                          | 44% less REM sleep/24h; no increase in NREM sleep and delta activity after sleep deprivation; paroxysmal EEG discharges in waking and NREM sleep                                                                        | 97       |
| <i>Rab3</i> ( <i>earlybird</i> ), Asp77Gly point mutation<br><i>Rab3</i> KO mice                              | ~ 25% increase NREM sleep/24h in <i>Rab3a</i> <sup>-/-</sup> (but not in <i>Rab3 Ebd/Ebd</i> ); reduced increase in sleep time after sleep deprivation in both (EEG power not studied)                                  | 98       |
| <i>Rim1alpha</i> (Rab3 interacting molecule 1 alpha) KO mice                                                  | ~ 50% less REM sleep /24h; ~ 35% less NREM sleep in the dark phase only                                                                                                                                                 | 99       |
| <i>Fos</i> KO mice                                                                                            | ~27% more waking/24h, ~ 25% less NREM/24h                                                                                                                                                                               | 100      |
| <i>Fosb</i> KO mice                                                                                           | ~35% less REM/24h                                                                                                                                                                                                       | 100      |

|                                                                                                                                                                                                         |                                                                                                                                                                                                                                                                                                                                                                                     |                                   |
|---------------------------------------------------------------------------------------------------------------------------------------------------------------------------------------------------------|-------------------------------------------------------------------------------------------------------------------------------------------------------------------------------------------------------------------------------------------------------------------------------------------------------------------------------------------------------------------------------------|-----------------------------------|
| <i>CREB alpha/delta</i> ( cyclic AMP-response element binding protein, alpha and delta isoforms) deficient mice                                                                                         | <20% more NREM sleep/24h; normal response to sleep deprivation                                                                                                                                                                                                                                                                                                                      | <sup>101</sup>                    |
| <b>Ion Channels</b>                                                                                                                                                                                     |                                                                                                                                                                                                                                                                                                                                                                                     |                                   |
| <b><i>Shaker</i> (voltage-dependent potassium channel, alpha subunit) loss of function mutations (<i>Sh<sup>msn</sup></i>, <i>Sh<sup>102</sup></i>, <i>Sh<sup>133</sup></i>, <i>Sh<sup>M</sup></i>)</b> | ~60-85% decrease in daily sleep amount (depending on allele and genetic background), mainly due to decrease in sleep episode duration; hyperactivity; normal circadian and homeostatic regulation of sleep; memory impairment, reduced lifespan                                                                                                                                     | <sup>102</sup><br>EMS mutagenesis |
| <i>Cav2.2</i> (N-type Ca <sup>++</sup> channel, alpha1B subunit) KO mice                                                                                                                                | Normal 24h sleep/waking amounts; longer, fewer REM sleep episodes; overall EEG spectral power increased in waking and REM sleep and decreased in NREM sleep                                                                                                                                                                                                                         | <sup>103</sup>                    |
| <i>Cav3.1</i> (T-type calcium channel, alpha1G subunit) global KO mice                                                                                                                                  | ~10% less NREM sleep/24h; more brief awakenings; decreased NREM EEG power in the 2-6.5Hz range and at 9.5-10Hz (2.5min recordings only)                                                                                                                                                                                                                                             | <sup>104</sup>                    |
| <i>Cav3.1</i> (T-type calcium channel, alpha1G subunit ) global, thalamic, or cortical KO mice                                                                                                          | <20% less NREM sleep and more brief awakenings in mice with global or thalamic deletion; normal sleep mice with cortical deletion; increase in NREM delta activity in global and thalamic KO mice is mentioned                                                                                                                                                                      | <sup>105</sup>                    |
| <i>Kv1.2</i> (voltage-dependent potassium channel) KO mice                                                                                                                                              | 23% less NREM sleep/24h (at P17; early death due to seizures)                                                                                                                                                                                                                                                                                                                       | <sup>106</sup>                    |
| <i>Kcnc1</i> , <i>Kcnc3</i> , <i>Kcnc1/3</i> ( <i>Kv3.1</i> , <i>Kv3.3</i> voltage-dependent potassium channel) KO mice                                                                                 | Double KO ( <i>Kv3.1/Kv3.3</i> ): ~30% less total sleep/24h (37% less in the light phase, 23% less in the dark phase), shorter NREM sleep episodes; similar effects in <i>Kv3.1</i> KO mice; no sleep loss in <i>Kv3.3</i> KO mice<br>overall decrease in EEG spectral power, but mainly in NREM sleep (<15Hz); no increase in sleep time or delta activity after sleep deprivation | <sup>107</sup><br><sup>108</sup>  |
| <i>Kcnc2</i> ( <i>Kv3.2</i> voltage-dependent potassium channel) KO mice                                                                                                                                | Normal 24h sleep/waking amounts; normal response to sleep deprivation; subtle change in EEG power spectrum (3-6Hz) in sleep                                                                                                                                                                                                                                                         | <sup>109</sup>                    |
| <i>Kcnn2</i> ( <i>Sk2</i> calcium-dep. small conductance potassium channel) KO mice                                                                                                                     | Overall decrease in EEG power in all states, but more pronounced in NREM sleep; increased brief awakenings                                                                                                                                                                                                                                                                          | <sup>110</sup>                    |

## References

1. Partinen, M., Kaprio, J., Koskenvuo, M., Putkonen, P. & Langinvainio, H. Genetic and environmental determination of human sleep. *Sleep* 6(3), 179-185 (1983).
2. Heath, A.C., Kendler, K.S., Eaves, L.J. & Martin, N.G. Evidence for genetic influences on sleep disturbance and sleep pattern in twins. *Sleep* 13(4), 318-335 (1990).
3. McCarren, M., Goldberg, J., Ramakrishnan, V. & Fabsitz, R. Insomnia in Vietnam era veteran twins: influence of genes and combat experience. *Sleep* 17, 456-61 (1994).
4. Carmelli, D., Bliwise, D.L., Swan, G.E. & Reed, T. A genetic analysis of the Epworth Sleepiness Scale in 1560 World War II male veteran twins in the NAS-NRC Twin Registry. *J Sleep Res* 10, 53-8 (2001).
5. Vink, J.M., Groot, A.S., Kerkhof, G.A. & Boomsma, D.I. Genetic analysis of morningness and eveningness. *Chronobiol Int* 18, 809-22 (2001).
6. Carmelli, D., Colrain, I.M., Swan, G.E. & Bliwise, D.L. Genetic and environmental influences in sleep-disordered breathing in older male twins. *Sleep* 27, 917-22 (2004).
7. Watson, N.F., Goldberg, J., Arguelles, L. & Buchwald, D. Genetic and environmental influences on insomnia, daytime sleepiness, and obesity in twins. *Sleep* 29, 645-9 (2006).
8. Luciano, M. et al. "No thanks, it keeps me awake": the genetics of coffee-attributed sleep disturbance. *Sleep* 30, 1378-86 (2007).
9. Koskenvuo, M., Hublin, C., Partinen, M., Heikkila, K. & Kaprio, J. Heritability of diurnal type: a nationwide study of 8753 adult twin pairs. *J Sleep Res* 16, 156-62 (2007).
10. Linkowski, P. EEG sleep patterns in twins. *J Sleep Res* 8 Suppl 1, 11-3 (1999).
11. Ambrosius, U. et al. Heritability of Sleep Electroencephalogram. *Biol Psychiatry* (2008).
12. De Gennaro, L. et al. The electroencephalographic fingerprint of sleep is genetically determined: a twin study. *Ann Neurol* 64, 455-60 (2008).
13. Naylor, E. et al. The circadian clock mutation alters sleep homeostasis in the mouse. *J Neurosci* 20, 8138-43 (2000).
14. Franken, P., Lopez-Molina, L., Marcacci, L., Schibler, U. & Tafti, M. The transcription factor DBP affects circadian sleep consolidation and rhythmic EEG activity. *J Neurosci* 20, 617-25 (2000).
15. Wisor, J.P. et al. A role for cryptochromes in sleep regulation. *BMC Neurosci* 3, 20. (2002).
16. Wisor, J.P. et al. Sleep deprivation effects on circadian clock gene expression in the cerebral cortex parallel electroencephalographic differences among mouse strains. *J Neurosci* 28, 7193-201 (2008).
17. Kopp, C., Albrecht, U., Zheng, B. & Tobler, I. Homeostatic sleep regulation is preserved in mPer1 and mPer2 mutant mice. *Eur J Neurosci* 16, 1099-106 (2002).
18. Shiromani, P.J. et al. Sleep rhythmicity and homeostasis in mice with targeted disruption of mPeriod genes. *Am J Physiol Regul Integr Comp Physiol* 287, R47-57 (2004).
19. Laposky, A. et al. Deletion of the mammalian circadian clock gene BMAL1/Mop3 alters baseline sleep architecture and the response to sleep deprivation. *Sleep* 28, 395-409 (2005).



20. Dudley, C.A. et al. Altered patterns of sleep and behavioral adaptability in NPAS2-deficient mice. *Science* 301, 379-83 (2003).
21. Franken, P. et al. NPAS2 as a transcriptional regulator of non-rapid eye movement sleep: Genotype and sex interactions. *Proc Natl Acad Sci U S A* 103, 7118-23 (2006).
22. Hu, W.P. et al. Altered circadian and homeostatic sleep regulation in prokineticin 2-deficient mice. *Sleep* 30, 247-56 (2007).
23. Stenberg, D. et al. Sleep and its homeostatic regulation in mice lacking the adenosine A1 receptor. *J Sleep Res* 12, 283-90 (2003).
24. Huang, Z.L. et al. Adenosine A2A, but not A1, receptors mediate the arousal effect of caffeine. *Nat Neurosci* 8, 858-9 (2005).
25. Urade, Y. et al. Sleep regulation in adenosine A2A receptor-deficient mice. *Neurology* 61, S94-6 (2003).
26. Hayaishi, O., Urade, Y., Eguchi, N. & Huang, Z.L. Genes for prostaglandin d synthase and receptor as well as adenosine A2A receptor are involved in the homeostatic regulation of nrem sleep. *Arch Ital Biol* 142, 533-9 (2004).
27. Fonck, C. et al. Novel seizure phenotype and sleep disruptions in knock-in mice with hypersensitive alpha 4\* nicotinic receptors. *J Neurosci* 25, 11396-411 (2005).
28. Lena, C. et al. Beta2-containing nicotinic receptors contribute to the organization of sleep and regulate putative micro-arousals in mice. *J Neurosci* 24, 5711-8 (2004).
29. Cohen, G. et al. beta 2 nicotinic acetylcholine receptor subunit modulates protective responses to stress: A receptor basis for sleep-disordered breathing after nicotine exposure. *Proc Natl Acad Sci U S A* 99, 13272-7 (2002).
30. Goutagny, R. et al. Paradoxical sleep in mice lacking M3 and M2/M4 muscarinic receptors. *Neuropsychobiology* 52, 140-6 (2005).
31. Wisor, J.P. et al. Dopaminergic role in stimulant-induced wakefulness. *J Neurosci* 21, 1787-94. (2001).
32. Real, C. et al. Sleep apneas are increased in mice lacking monoamine oxidase A. *Sleep* 30, 1295-302 (2007).
33. Ouyang, M., Hellman, K., Abel, T. & Thomas, S.A. Adrenergic signaling plays a critical role in the maintenance of waking and in the regulation of REM sleep. *J Neurophysiol* 92, 2071-82 (2004).
34. Hunsley, M.S. & Palmiter, R.D. Norepinephrine-deficient mice exhibit normal sleep-wake states but have shorter sleep latency after mild stress and low doses of amphetamine. *Sleep* 26, 521-6 (2003).
35. Hunsley, M.S. & Palmiter, R.D. Altered sleep latency and arousal regulation in mice lacking norepinephrine. *Pharmacol Biochem Behav* 78, 765-73 (2004).
36. Wisor, J.P. et al. Altered rapid eye movement sleep timing in serotonin transporter knockout mice. *Neuroreport* 14, 233-8 (2003).
37. Alexandre, C. et al. Early life blockade of 5-hydroxytryptamine 1A receptors normalizes sleep and depression-like behavior in adult knock-out mice lacking the serotonin transporter. *J Neurosci* 26, 5554-64 (2006).
38. Boutrel, B., Monaca, C., Hen, R., Hamon, M. & Adrien, J. Involvement of 5-HT1A receptors in homeostatic and stress-induced adaptive regulations of paradoxical sleep: studies in 5-HT1A knock-out mice. *J Neurosci* 22, 4686-92 (2002).
39. Boutrel, B., Franc, B., Hen, R., Hamon, M. & Adrien, J. Key role of 5-HT1B receptors in the regulation of paradoxical sleep as evidenced in 5-HT1B knock-out mice. *J Neurosci* 19, 3204-12 (1999).

40. Popa, D. et al. Contribution of 5-HT<sub>2</sub> receptor subtypes to sleep-wakefulness and respiratory control, and functional adaptations in knock-out mice lacking 5-HT<sub>2A</sub> receptors. *J Neurosci* 25, 11231-8 (2005).
41. Frank, M.G., Stryker, M.P. & Tecott, L.H. Sleep and sleep homeostasis in mice lacking the 5-HT<sub>2c</sub> receptor. *Neuropsychopharmacology* 27, 869-73 (2002).
42. Hedlund, P.B., Huitron-Resendiz, S., Henriksen, S.J. & Sutcliffe, J.G. 5-HT<sub>7</sub> receptor inhibition and inactivation induce antidepressantlike behavior and sleep pattern. *Biol Psychiatry* 58, 831-7 (2005).
43. Parmentier, R. et al. Anatomical, physiological, and pharmacological characteristics of histidine decarboxylase knock-out mice: evidence for the role of brain histamine in behavioral and sleep-wake control. *J Neurosci* 22, 7695-711 (2002).
44. Huang, Z.L. et al. Arousal effect of orexin A depends on activation of the histaminergic system. *Proc Natl Acad Sci U S A* 98, 9965-70 (2001).
45. Huang, Z.L. et al. Altered sleep-wake characteristics and lack of arousal response to H<sub>3</sub> receptor antagonist in histamine H<sub>1</sub> receptor knockout mice. *Proc Natl Acad Sci U S A* 103, 4687-92 (2006).
46. Parmentier, R. et al. The brain H<sub>3</sub>-receptor as a novel therapeutic target for vigilance and sleep-wake disorders. *Biochem Pharmacol* 73, 1157-71 (2007).
47. Chemelli, R.M. et al. Narcolepsy in orexin knockout mice: Molecular genetics of sleep regulation. *Cell* 98, 437-451 (1999).
48. Mochizuki, T. et al. Behavioral state instability in orexin knock-out mice. *J Neurosci* 24, 6291-300 (2004).
49. Diniz Behn, C.G., Kopell, N., Brown, E.N., Mochizuki, T. & Scammell, T.E. Delayed orexin signaling consolidates wakefulness and sleep: physiology and modeling. *J Neurophysiol* 99, 3090-103 (2008).
50. Hara, J. et al. Genetic ablation of orexin neurons in mice results in narcolepsy, hypophagia, and obesity. *Neuron* 30, 345-54. (2001).
51. Beuckmann, C.T. et al. Expression of a poly-glutamine-ataxin-3 transgene in orexin neurons induces narcolepsy-cataplexy in the rat. *J Neurosci* 24, 4469-77 (2004).
52. Sakurai, T. The neural circuit of orexin (hypocretin): maintaining sleep and wakefulness. *Nat Rev Neurosci* 8, 171-81 (2007).
53. Willie, J.T. et al. Distinct narcolepsy syndromes in Orexin receptor-2 and Orexin null mice: molecular genetic dissection of Non-REM and REM sleep regulatory processes. *Neuron* 38, 715-30 (2003).
54. Tobler, I., Kopp, C., Deboer, T. & Rudolph, U. Diazepam-induced changes in sleep: role of the alpha 1 GABA(A) receptor subtype. *Proc Natl Acad Sci U S A* 98, 6464-9 (2001).
55. Kopp, C., Rudolph, U., Low, K. & Tobler, I. Modulation of rhythmic brain activity by diazepam: GABA(A) receptor subtype and state specificity. *Proc Natl Acad Sci U S A* 101, 3674-9 (2004).
56. Kopp, C., Rudolph, U., Keist, R. & Tobler, I. Diazepam-induced changes on sleep and the EEG spectrum in mice: role of the alpha3-GABA(A) receptor subtype. *Eur J Neurosci* 17, 2226-30 (2003).
57. Winsky-Sommerer, R. et al. Normal sleep homeostasis and lack of epilepsy phenotype in GABA(A) receptor alpha3 subunit-knockout mice. *Neuroscience* 154, 595-605 (2008).
58. Laposky, A.D., Homanics, G.E., Basile, A. & Mendelson, W.B. Deletion of the GABA(A) receptor beta 3 subunit eliminates the hypnotic actions of oleamide in mice. *Neuroreport* 12, 4143-7 (2001).

59. Wisor, J.P., DeLorey, T.M., Homanics, G.E. & Edgar, D.M. Sleep states and sleep electroencephalographic spectral power in mice lacking the beta 3 subunit of the GABA(A) receptor. *Brain Res* 955, 221-8 (2002).
60. Winsky-Sommerer, R., Vyazovskiy, V.V., Homanics, G.E. & Tobler, I. The EEG effects of THIP (Gaboxadol) on sleep and waking are mediated by the GABA(A)delta-subunit-containing receptors. *Eur J Neurosci* 25, 1893-9 (2007).
61. Steenland, H.W., Kim, S.S. & Zhuo, M. GluR3 subunit regulates sleep, breathing and seizure generation. *Eur J Neurosci* 27, 1166-73 (2008).
62. Miyamoto, H., Katagiri, H. & Hensch, T. Experience-dependent slow-wave sleep development. *Nat Neurosci* 6, 553-4 (2003).
63. Koh, K. et al. Identification of SLEEPLESS, a sleep-promoting factor. *Science* 321, 372-6 (2008).
64. Tafti, M. et al. Deficiency in short-chain fatty acid beta-oxidation affects theta oscillations during sleep. *Nat Genet* 34, 320-5 (2003).
65. Maret, S. et al. Retinoic acid signaling affects cortical synchrony during sleep. *Science* 310, 111-3 (2005).
66. Pinzar, E. et al. Prostaglandin D synthase gene is involved in the regulation of non-rapid eye movement sleep. *Proc Natl Acad Sci U S A* 97, 4903-7 (2000).
67. Qu, W.M. et al. Lipocalin-type prostaglandin D synthase produces prostaglandin D2 involved in regulation of physiological sleep. *Proc Natl Acad Sci U S A* 103, 17949-54 (2006).
68. Mizoguchi, A. et al. Dominant localization of prostaglandin D receptors on arachnoid trabecular cells in mouse basal forebrain and their involvement in the regulation of non-rapid eye movement sleep. *Proc Natl Acad Sci U S A* 98, 11674-9 (2001).
69. Fang, J., Wang, Y. & Krueger, J.M. Effects of interleukin-1 beta on sleep are mediated by the type I receptor. *Am J Physiol* 274, R655-60 (1998).
70. Morrow, J.D. & Opp, M.R. Sleep-wake behavior and responses of interleukin-6-deficient mice to sleep deprivation. *Brain Behav Immun* 19, 28-39 (2005).
71. Morrow, J.D. & Opp, M.R. Diurnal variation of lipopolysaccharide-induced alterations in sleep and body temperature of interleukin-6-deficient mice. *Brain Behav Immun* 19, 40-51 (2005).
72. Toth, L.A. & Opp, M.R. Cytokine- and microbially induced sleep responses of interleukin-10 deficient mice. *Am J Physiol Regul Integr Comp Physiol* 280, R1806-14 (2001).
73. Fang, J., Wang, Y. & Krueger, J.M. Mice lacking the TNF 55 kDa receptor fail to sleep more after TNFalpha treatment. *J Neurosci* 17, 5949-55 (1997).
74. Deboer, T., Fontana, A. & Tobler, I. Tumor necrosis factor (TNF) ligand and TNF receptor deficiency affects sleep and the sleep EEG. *J Neurophysiol* 88, 839-46 (2002).
75. Bohnet, S.G., Traynor, T.R., Majde, J.A., Kacsoh, B. & Krueger, J.M. Mice deficient in the interferon type I receptor have reduced REM sleep and altered hypothalamic hypocretin, prolactin and 2',5'-oligoadenylate synthetase expression. *Brain Res* 1027, 117-25 (2004).
76. Jhaveri, K.A., Ramkumar, V., Trammell, R.A. & Toth, L.A. Spontaneous, homeostatic, and inflammation-induced sleep in NF-kappaB p50 knockout mice. *Am J Physiol Regul Integr Comp Physiol* 291, R1516-26 (2006).

77. Chen, L., Majde, J.A. & Krueger, J.M. Spontaneous sleep in mice with targeted disruptions of neuronal or inducible nitric oxide synthase genes. *Brain Res* 973, 214-22 (2003).
78. Langmesser, S. et al. cGMP-dependent protein kinase type I is implicated in the regulation of the timing and quality of sleep and wakefulness. *PLoS ONE* 4, e4238 (2009).
79. Vyazovskiy, V.V. et al. Sleep and rest regulation in young and old oestrogen-deficient female mice. *J Neuroendocrinol* 18, 567-76 (2006).
80. Laposky, A.D. et al. Altered sleep regulation in leptin-deficient mice. *Am J Physiol Regul Integr Comp Physiol* 290, R894-903 (2006).
81. Szentirmai, E., Kapas, L., Sun, Y., Smith, R.G. & Krueger, J.M. Spontaneous sleep and homeostatic sleep regulation in ghrelin knockout mice. *Am J Physiol Regul Integr Comp Physiol* 293, R510-7 (2007).
82. Obal, F., Jr. et al. Rapid eye movement sleep is reduced in prolactin-deficient mice. *J Neurosci* 25, 10282-9 (2005).
83. Obal, F., Jr. et al. Deficiency of growth hormone-releasing hormone signaling is associated with sleep alterations in the dwarf rat. *J Neurosci* 21, 2912-8 (2001).
84. Obal, F., Jr., Alt, J., Taishi, P., Gardi, J. & Krueger, J.M. Sleep in mice with nonfunctional growth hormone-releasing hormone receptors. *Am J Physiol Regul Integr Comp Physiol* 284, R131-9 (2003).
85. Zhang, J., Obal, F., Jr., Fang, J., Collins, B.J. & Krueger, J.M. Non-rapid eye movement sleep is suppressed in transgenic mice with a deficiency in the somatotrophic system. *Neurosci Lett* 220, 97-100 (1996).
86. Hajdu, I., Obal, F., Jr., Fang, J., Krueger, J.M. & Rollo, C.D. Sleep of transgenic mice producing excess rat growth hormone. *Am J Physiol Regul Integr Comp Physiol* 282, R70-6 (2002).
87. Adamantidis, A. et al. Sleep architecture of the melanin-concentrating hormone receptor 1-knockout mice. *Eur J Neurosci* 27, 1793-800 (2008).
88. Huitron-Resendiz, S., Sanchez-Alavez, M., Wills, D.N., Cravatt, B.F. & Henriksen, S.J. Characterization of the sleep-wake patterns in mice lacking fatty acid amide hydrolase. *Sleep* 27, 857-65 (2004).
89. Shin, J., Kim, D., Bianchi, R., Wong, R.K. & Shin, H.S. Genetic dissection of theta rhythm heterogeneity in mice. *Proc Natl Acad Sci U S A* 102, 18165-70 (2005).
90. Kimura, M. et al. Conditional corticotropin-releasing hormone overexpression in the mouse forebrain enhances rapid eye movement sleep *Molecular Psychiatry* in press(2009).
91. Tobler, I. et al. Altered circadian activity rhythms and sleep in mice devoid of prion protein. *Nature* 380, 639-642 (1996).
92. Tobler, I., Deboer, T. & Fischer, M. Sleep and sleep regulation in normal and prion protein-deficient mice. *J Neurosci* 17, 1869-79 (1997).
93. Dossena, S. et al. Mutant prion protein expression causes motor and memory deficits and abnormal sleep patterns in a transgenic mouse model. *Neuron* 60, 598-609 (2008).
94. Huitron-Resendiz, S. et al. Age-independent and age-related deficits in visuospatial learning, sleep-wake states, thermoregulation and motor activity in PDAPP mice. *Brain Res* 928, 126-37 (2002).
95. Andrieux, A. et al. The suppression of brain cold-stable microtubules in mice induces synaptic defects associated with neuroleptic-sensitive behavioral disorders. *Genes Dev* 16, 2350-64 (2002).

96. Ferland, R.J. et al. Characterization of Rho-GDI $\gamma$  and Rho-GDI $\alpha$  mRNA in the developing and mature brain with an analysis of mice with targeted deletions of Rho-GDI $\gamma$ . *Brain Res* 1054, 9-21 (2005).
97. Colas, D., Wagstaff, J., Fort, P., Salvert, D. & Sarda, N. Sleep disturbances in Ube3a maternal-deficient mice modeling Angelman syndrome. *Neurobiol Dis* 20, 471-8 (2005).
98. Kapfhamer, D. et al. Mutations in Rab3a alter circadian period and homeostatic response to sleep loss in the mouse. *Nat Genet* 32, 290-5 (2002).
99. Lonart, G., Tang, X., Simsek-Duran, F., Machida, M. & Sanford, L.D. The role of active zone protein Rab3 interacting molecule 1 alpha in the regulation of norepinephrine release, response to novelty, and sleep. *Neuroscience* 154, 821-31 (2008).
100. Shiromani, P.J. et al. Sleep and wakefulness in c-fos and fos B gene knockout mice. *Brain Res Mol Brain Res* 80, 75-87 (2000).
101. Graves, L.A. et al. Genetic Evidence for a Role of CREB in Sustained Cortical Arousal. *J Neurophysiol* 23, 23 (2003).
102. Cirelli, C. et al. Reduced sleep in Drosophila Shaker mutants. *Nature* 434, 1087-92 (2005).
103. Beuckmann, C.T., Sinton, C.M., Miyamoto, N., Ino, M. & Yanagisawa, M. N-type calcium channel alpha1B subunit (Cav2.2) knock-out mice display hyperactivity and vigilance state differences. *J Neurosci* 23, 6793-7 (2003).
104. Lee, J., Kim, D. & Shin, H.S. Lack of delta waves and sleep disturbances during non-rapid eye movement sleep in mice lacking alpha1G-subunit of T-type calcium channels. *Proc Natl Acad Sci U S A* 101, 18195-9 (2004).
105. Anderson, M.P. et al. Thalamic Cav3.1 T-type Ca<sup>2+</sup> channel plays a crucial role in stabilizing sleep. *Proc Natl Acad Sci U S A* 102, 1743-8 (2005).
106. Douglas, C.L. et al. Sleep in Kcna2 knockout mice. *BMC Biol* 5, 42 (2007).
107. Espinosa, F., Marks, G., Heintz, N. & Joho, R.H. Increased motor drive and sleep loss in mice lacking Kv3-type potassium channels. *Genes Brain Behav* 3, 90-100 (2004).
108. Espinosa, F., Torres-Vega, M.A., Marks, G.A. & Joho, R.H. Ablation of Kv3.1 and Kv3.3 potassium channels disrupts thalamocortical oscillations in vitro and in vivo. *J Neurosci* 28, 5570-81 (2008).
109. Vyazovskiy, V.V. et al. Sleep EEG in mice that are deficient in the potassium channel subunit K.v.3.2. *Brain Res* 947, 204-11 (2002).
110. Cueni, L. et al. T-type Ca<sup>2+</sup> channels, SK2 channels and SERCAs gate sleep-related oscillations in thalamic dendrites. *Nat Neurosci* 11, 683-92 (2008).
